# Supplementary material
Source: publisher figshare collection journal article supplement (https://sage.figshare.com/ndownloader/files/12441572)
Supplement: Supplementary file 1 [file 12441572]

**Supplementary file 1: Medline search strategy**

-----

- 1 Autistic Disorder/ (20812)
- 2 Asperger Syndrome/ (1881)
- 3 (autism or autistic or asperger\$).ti,ab. (40087)
- 4 1 or 2 or 3 (42826)
- 5 exp adult/ or middle aged/ or young adult/ (6972978)
- 6 (adult\$ or men or women or worker\$ or employee\$).ti,ab. (2317489)
- 7 (young people or young person\$).ti,ab. (25664)
- 8 5 or 6 or 7 (7993338)
- 9 4 and 8 (11631)
- 10 ((autism or autistic) adj2 (service\$ or treatment\$ or intervention\$ or support\$)).ti,ab. (1185)
- 11 (psychosocial adj2 (intervention\$ or treat\$ or therap\$ or prevent\$)).ti,ab. (8102)
- 12 (prevent\$ adj2 (intervention\$ or treat\$ or therap\$ or strateg\$ or approach\$ or program\$ or service\$)).ti,ab. (220328)
- 13 (targeted\$ adj2 (intervention\$ or treat\$ or therap\$ or strateg\$ or approach\$ or program\$ or service\$)).ti,ab. (69062)
- 14 (intervention adj2 (program\$ or strateg\$)).ti,ab. (29169)
- 15 Secondary Prevention/ (19465)
- 16 exp Cognitive Therapy/ (25382)
- 17 CBT.ti,ab. (8910)
- 18 ((cognitive or cognition) adj2 (therap\$ or treat\$ or program\$ or skill\$ or behavio\$ or intervention\$)).ti,ab. (48735)
- 19 Psychotherapy, Group/ (13807)
- 20 (group therapy or group psychotherapy or group psychoeducation or group intervention\$ or groupwork\$ or group work\$).ti,ab. (10766)
- 21 (low level intervention\$ or low intensity intervention\$).ti,ab. (209)
- 22 (brief adj2 intervention\$).ti,ab. (5555)

- 23 (model or models or modelling).ti,ab. (2442699)
- 24 (cue or cues or cueing).ti,ab. (81708)
- 25 (prompt or prompts or prompting).ti,ab. (67653)
- 26 applied behavior analysis.ti,ab. (382)
- 27 applied behaviour analysis.ti,ab. (29)
- 28 exp "Reinforcement (Psychology)"/ (55190)
- 29 social skills/ (764)
- 30 "Activities of Daily Living"/ (63446)
- 31 Occupational Therapy/ (12224)
- 32 (social skill\$ or life skill\$).ti,ab. (5543)
- 33 (independen\$ adj2 (live or lives or living)).ti,ab. (4879)
- 34 ((promot\$ or encourag\$ or support\$ or enhanc\$ or increas\$) adj2 (empathy or socialization or socialisation or interaction or friend\$)).ti,ab. (14494)
- 35 ((promot\$ or encourag\$ or support\$ or enhanc\$ or increas\$) adj2 (independen\$ or engagement\$ or involvement or inclusion or participation)).ti,ab. (35366)
- 36 Self Care/ (32143)
- 37 Self-Help Groups/ (9293)
- 38 (self help or selfhelp or self care or selfcare).ti,ab. (20879)
- 39 Social Participation/ or Friends/ (6074)
- 40 (social activit\$ or social group\$ or social involve\$ or social inclusion or social network\$).ti,ab. (24063)
- 41 (community activit\$ or community group\$ or community involve\$ or community inclusion or community network\$).ti,ab. (4344)
- 42 (games or leisure or sport or sports or hobby or hobbies).ti,ab. (79621)
- 43 exp Leisure Activities/ (221293)
- 44 community networks/ or social support/ (73709)
- 45 Mentors/ (10386)
- 46 (support\$ or coach\$ or mentor\$ or befriend\$ or broker\$ or advise\$ or advisor\$).ti,ab. (1442578)

- 47 Patient Advocacy/ (24809)
- 48 (advocacy or advocate\$.ti,ab. (59381)
- 49 "access to service\$.ti,ab. (3187)
- 50 (information adj2 (service or provid\$ or provision or give or gives or giving or gave)).ti,ab. (169709)
- 51 (advice adj2 (service or provid\$ or provision or give or gives or giving or gave)).ti,ab. (5680)
- 52 "advice and information".ti,ab. (351)
- 53 exp Self Concept/ (103386)
- 54 (self esteem or selfesteem or self-esteem or self confiden\$ or selfconfiden\$ or self-confiden\$).ti,ab. (21271)
- 55 person centred approach.ti. (22)
- 56 Patient-Centered Care/ (16159)
- 57 Caregivers/ (31213)
- 58 ((Carer\$1 or caregiv\$ or caretaker\$ or care taker\$ or custodian\$ or family or families of father\$ or mother\$ or parent\$ or sibling\$ or brother\$ or sister\$ or spouse\$ or wife\$ or husband\$ or partner\$ or peer or peers or friend\$ or online) adj2 (group\$ or support\$ or network\$)).ti,ab. (49241)
- 59 exp Self-Help Devices/ (10575)
- 60 ((assistive or enabl\$) adj2 (device\$ or technolog\$)).ti,ab. (10836)
- 61 exp Cell Phones/ (9805)
- 62 Mobile Applications/ (2009)
- 63 Communication Aids for Disabled/ (2532)
- 64 ((mobile or cell or cellular or personal or smart or android) adj (phone\$ or device\$ or technolog\$)).ti,ab. (13582)
- 65 computers/ or computers, handheld/ (57452)
- 66 (laptop\$ or PDA\$ or personal digital assistant\$ or iPad\$ or iPod\$).ti,ab. (17089)
- 67 ((computer or internet) adj (game\$ or simulat\$)).ti,ab. (25342)
- 68 exp Employment/ (81080)
- 69 ((employment or work or workplace or job or vocational) adj2 (train\$ or prepar\$ or opportunit\$ or skill\$ or rehabilitat\$ or support\$ or placement\$)).ti,ab. (20993)
- 70 "individual placement and support".ti,ab. (225)

- 71 (vocational adj (independence or engagement)).ti,ab. (20)
- 72 (autism adj2 champion\$).ti,ab. (0)
- 73 multidisciplinary team\$.ti,ab. (13086)
- 74 Patient Care Team/ (62130)
- 75 or/10-74 (4946934)
- 76 9 and 75 (4615)
- 77 exp adult/ or middle aged/ or young adult/ (6972978)
- 78 (adult\$ or men or women or man or woman or worker\$ or employee\$).ti. (782370)
- 79 (people or person\$).ti,ab. (926171)
- 80 77 or 78 or 79 (7733719)
- 81 76 and 80 (3666)
- 82 exp animals/ not humans.sh. (4859611)
- 83 81 not 82 (3615)

**Supplementary file 2: Further information on screening**

**Table 1. References excluded at full-text screening**

| Reference                                                                                                                                                                                                                                                                                              | Excl. code |
|--------------------------------------------------------------------------------------------------------------------------------------------------------------------------------------------------------------------------------------------------------------------------------------------------------|------------|
| Alexander MGF, Dummer GM, Smeltzer A, et al. (2011) Developing the social skills of young adult Special Olympics athletes. <i>Education and Training in Autism and Developmental Disabilities</i> 46: 297-310.                                                                                         | 2          |
| Allen KD, Burke RV, Howard MR, et al. (2012) Use of audio cuing to expand employment opportunities for adolescents with autism spectrum disorders and intellectual disabilities. <i>Journal of Autism &amp; Developmental Disorders</i> 42: 2410-2419.                                                 | 2          |
| Allen KD, Wallace DP, Greene DJ, et al. (2010) Community-based vocational instruction using videotaped modeling for young adults with autism spectrum disorders performing in air-inflated mascots. <i>Focus on Autism and Other Developmental Disabilities</i> 25: 186-192.                           | 4          |
| Allen KD, Wallace DP, Renes D, et al. (2010) Use of video modeling to teach vocational skills to adolescents and young adults with autism spectrum disorders. <i>Education &amp; Treatment of Children</i> 33: 339-349.                                                                                | 4          |
| Ames ME, McMorris CA, Alli LN, et al. (2016) Overview and evaluation of a mentorship program for university students with ASD. <i>Focus on Autism and Other Developmental Disabilities</i> 31: 27-36.                                                                                                  | 1          |
| Arikawa M, Goto H and Mineno K. (2013) Job support by occupational therapists for people with developmental disabilities: two case studies. <i>Work</i> 45: 245-251.                                                                                                                                   | 1          |
| Ashburner J, Ziviani J, Rodger S, et al. (2015) Improving transfer of learning: An innovative comentoring program to enhance workplace implementation after an occupational therapy course on Autism Spectrum Disorders. <i>Journal of Continuing Education in the Health Professions</i> 35: 270-277. | 2          |
| Bailey DA. (2009) <i>Analysis of a social story intervention to increase appropriate social interactions in children with autism</i> . PhD thesis, Florida State University.                                                                                                                           | 2          |
| Beadle D et al. (2013) The A Factor experience: enabling people with autism to have a voice. <i>Good Autism Practice</i> 14: 37-45.                                                                                                                                                                    | 1          |
| Begley J. (2014) Connect: the development of an online social network for people on the autism spectrum and their families. <i>Good Autism Practice</i> 15: 15-22.                                                                                                                                     | 1          |
| Bennett KD, Ramasamy R and Honsberger T. (2013) Further examination of covert audio coaching on improving employment skills among secondary students with autism. <i>Journal of Behavioral Education</i> 22: 103-119.                                                                                  | 2          |
| Bennett KD, Ramasamy R and Honsberger T. (2013) The effects of covert audio coaching on teaching clerical skills to adolescents with autism spectrum disorder. <i>Journal of Autism &amp; Developmental Disorders</i> 43: 585-593.                                                                     | 2          |
| Beresford B et al. (2013) <i>Transition to adult services and adulthood for young people with autistic spectrum conditions: final report</i> . University of York. Social Policy Research Unit.                                                                                                        | 1          |
| Bereznak S, Ayres KM, Mechling LC, et al. (2012) Video self-prompting and mobile technology to increase daily living and vocational independence for students with autism spectrum disorders. <i>Journal of Developmental and Physical Disabilities</i> 24: 269-285.                                   | 2          |
| Berger HJ, van Spaendonck KP, et al. (1993) Cognitive shifting as a predictor of progress in social understanding in high-functioning adolescents with autism: a prospective study. <i>Journal of Autism &amp; Developmental Disorders</i> 23: 341-359.                                                | 1          |
| Bethune LK. (2016) <i>The effects of the self-advocacy and conflict resolution training on ability to request and negotiate academic accommodations with high school students with Autism</i>                                                                                                          | 2          |

|                                                                                                                                                                                                                                                                                              |   |
|----------------------------------------------------------------------------------------------------------------------------------------------------------------------------------------------------------------------------------------------------------------------------------------------|---|
| <i>Spectrum Disorders</i> . PhD thesis. Charlotte: University of North Carolina.                                                                                                                                                                                                             |   |
| Beyer S et al. (2014) <i>Regional SEN Transition to Employment Initiative (Real Opportunities): impact of the Real Opportunities project</i> . Cardiff: University of Cardiff.                                                                                                               | 2 |
| Bottema KM. (2013) <i>Adolescents with social disabilities and their peers: Intervention, identity, and judgments about exclusion</i> . PhD thesis, University of California.                                                                                                                | 2 |
| Brady MP, Honsberger C, Cadette J, et al. (2016) Effects of a peer-mediated literacy based behavioral intervention on the acquisition and maintenance of daily living skills in adolescents with autism. <i>Education and Training in Autism and Developmental Disabilities</i> 51: 122-131. | 2 |
| Buescher AV, Cidav Z, Knapp M, et al. (2014) Costs of autism spectrum disorders in the United Kingdom and the United States. <i>JAMA Pediatrics</i> 168: 721-728.                                                                                                                            | 1 |
| Burckley E, Tincani M and Fisher Amanda G. (2015) An iPad™-based picture and video activity schedule increases community shopping skills of a young adult with autism spectrum disorder and intellectual disability. <i>Developmental Neurorehabilitation</i> 18: 131-136.                   | 2 |
| Burgess S and Cimera RE. (2014) Employment outcomes of transition-aged adults with autism spectrum disorders: a state of the States report. <i>American Journal on Intellectual &amp; Developmental Disabilities</i> 119: 64-83.                                                             | 1 |
| Burke RV, Allen KD, Howard MR, et al. (2013) Tablet-based video modeling and prompting in the workplace for individuals with autism. <i>Journal of Vocational Rehabilitation</i> 38: 1-14.                                                                                                   | 4 |
| Burke RV, Andersen MN, Bowen SL, et al. (2010) Evaluation of two instruction methods to increase employment options for young adults with autism spectrum disorders. <i>Research In Developmental Disabilities</i> 31: 1223-1233.                                                            | 4 |
| Burt DB, Fuller SP and Lewis KR. (1991) Brief report: competitive employment of adults with autism. <i>Journal of Autism &amp; Developmental Disorders</i> 21: 237-242.                                                                                                                      | 1 |
| Carter I and Wilson R. (2006) Reflections on face-to-face and online self-help group participation: comparing the views of persons with autism with those of parents speaking for their autistic children. <i>International Journal of Self Help &amp; Self Care</i> 5: 353-369.             | 1 |
| Cihak DF and Schrader L. (2009) Does the model matter? Comparing video self-modeling and video adult modeling for task acquisition and maintenance by adolescents with autism spectrum disorders. <i>Journal of Special Education Technology</i> 23.                                         | 2 |
| Cimera RE and Burgess S. (2011) Do adults with autism benefit monetarily from working in their communities? <i>Journal of Vocational Rehabilitation</i> 34: 173-180.                                                                                                                         | 1 |
| Cimera RE, Wehman P, West M, et al. (2012) Do sheltered workshops enhance employment outcomes for adults with autism spectrum disorder? <i>Autism</i> 16: 87-94.                                                                                                                             | 2 |
| Colver AF, Merrick H, Deverill M, et al. (2013) Study protocol: longitudinal study of the transition of young people with complex health needs from child to adult health services. <i>BMC Public Health</i> 13: 675.                                                                        | 1 |
| Costa S, Santos C, Soares F, et al. (2010) Promoting interaction amongst autistic adolescents using robots. <i>Conference Proceedings: Annual International Conference of the IEEE Engineering in Medicine &amp; Biology Society</i> 2010: 3856-3859.                                        | 2 |
| Couzens D, Poed S, Kataoka M, et al. (2015) Support for students with hidden disabilities in universities: A case study. <i>International Journal of Disability, Development and Education</i> 62: 24-41.                                                                                    | 1 |
| Curtiss SL and Ebata AT. (2016) Building capacity to deliver sex education to individuals with autism. <i>Sexuality and Disability</i> 34: 27-47.                                                                                                                                            | 2 |
| Dalferth M. (1993) [Adolescents with autism syndrome and autistic manifestations in vocational education centers]. <i>Rehabilitation</i> 32: 217-226.                                                                                                                                        | 5 |
| Dalferth M. (1993) [Adults with autism in workshops for the disabled.] <i>Rehabilitation</i> 32: 126-133.                                                                                                                                                                                    | 5 |
| Dalferth M. (1993) [Autistic patients in sheltered workshop for the handicapped]. <i>Rehabilitation</i> 32: 126-133.                                                                                                                                                                         | 5 |

|                                                                                                                                                                                                                                                                                                                                            |   |
|--------------------------------------------------------------------------------------------------------------------------------------------------------------------------------------------------------------------------------------------------------------------------------------------------------------------------------------------|---|
| Daly L, Sharek D, DeVries J, et al. (2015) The impact of four family support programmes for people with a disability in Ireland. <i>Journal of Intellectual Disabilities</i> 19: 34-50.                                                                                                                                                    | 2 |
| Diener ML, Wright CA, Wright SD, et al. (2016) Tapping into technical talent: Using technology to facilitate personal, social, and vocational skills in youth with autism spectrum disorder (ASD). In Cardon TA. [Ed] (2016) Technology and the treatment of children with autism spectrum disorder. Cham: Springer International; 97-112. | 1 |
| Dobson S, Upadhyaya S, McNeil J, et al. (2001) Developing an information pack for the Asian carers of people with autism spectrum disorders. <i>International Journal of Language &amp; Communication Disorders</i> 36 Suppl: 216-221.                                                                                                     | 1 |
| Dolan BK, Van Hecke AV, Carson AM, et al. (2016) Brief report: Assessment of intervention effects on in vivo peer interactions in adolescents with Autism Spectrum Disorder (ASD). <i>Journal of Autism and Developmental Disorders</i> 46: 2251-2259.                                                                                     | 2 |
| Dolyniuk CA, Kamens MW, Corman H, et al. (2002) Students with developmental disabilities go to college: Description of a collaborative transition project on a regular college campus. <i>Focus on Autism and Other Developmental Disabilities</i> 17: 236-241.                                                                            | 2 |
| Dotson WH, Richman DM, Abby L, et al. (2013) Teaching skills related to self-employment to adults with developmental disabilities: An analog analysis. <i>Research In Developmental Disabilities</i> 34: 2336-2350.                                                                                                                        | 4 |
| Dunkel-Jackson SM, Dixon MR and Szekely S. (2016) Self-control as generalized operant behavior by adults with autism spectrum disorder. <i>Journal of Applied Behavior Analysis</i> 49: 705-710.                                                                                                                                           | 2 |
| Ferguson H, Myles BS and Hagiwara T. (2005) Using a Personal Digital Assistant to enhance the independence of an adolescent with Asperger Syndrome. <i>Education and Training in Developmental Disabilities</i> 40: 60-67.                                                                                                                 | 2 |
| Foran AC. (2015) <i>Social interaction moderates enjoyment and perception of physical activity during exergame play in young adults with autism spectrum disorders</i> . PhD thesis, University of Southern California.                                                                                                                    | 2 |
| Ford CD. (2012) <i>An investigation of support programs for college students with high functioning autism or Asperger syndrome</i> . PhD thesis, University of Missouri.                                                                                                                                                                   | 1 |
| Fraser C. (2011) Can adults on the autism spectrum be affected positively by the use of intensive interaction in supported living services? <i>Good Autism Practice</i> 12: 37-42.                                                                                                                                                         | 2 |
| Fritsch A, Murad A, Kloss S, et al. (2009) Social skills training for autistic adults. <i>Annales Medico-Psychologiques</i> 167: 299-302.                                                                                                                                                                                                  | 5 |
| Fullerton A and Coyne P. (1999) Developing skills and concepts for self-determination in young adults with autism. <i>Focus on Autism and Other Developmental Disabilities</i> 14: 42-52.                                                                                                                                                  | 1 |
| Gal E, Selanikyo E, Erez AB et al. (2015) Integration in the vocational world: How does it affect quality of life and subjective well-being of young adults with ASD. <i>International Journal of Environmental Research &amp; Public Health</i> 12: 10820-10832.                                                                          | 2 |
| Ganz JB. (2001) Asperger Syndrome social skills games. <i>Intervention in School and Clinic</i> 36: 308-309.                                                                                                                                                                                                                               | 1 |
| Garcia-Villamizar D and Dattilo J. (2011) Social and clinical effects of a leisure program on adults with autism spectrum disorder. <i>Research in Autism Spectrum Disorders</i> 5: 246-253.                                                                                                                                               | 2 |
| Garcia-Villamizar D and Hughes C. (2007) Supported employment improves cognitive performance in adults with Autism. <i>Journal Of Intellectual Disability Research</i> 51: 142-150.                                                                                                                                                        | 4 |
| Garcia-Villamizar DA and Dattilo J. (2010) Effects of a leisure programme on quality of life and stress of individuals with ASD. <i>Journal Of Intellectual Disability Research</i> 54: 611-619.                                                                                                                                           | 2 |
| Gardner J, Mulry CM and Chalik S. (2012) Considering college?: Adolescents with autism and learning disorders participate in an on-campus service-learning program. <i>Occupational Therapy In Health Care</i> 26: 257-269.                                                                                                                | 1 |
| Gattegno M, Abenheim N and Wolff M. (2011) A programme of support in mainstream schools (primary school, secondary school, high school) and enterprises for people with                                                                                                                                                                    | 5 |

|                                                                                                                                                                                                                                                                                   |   |
|-----------------------------------------------------------------------------------------------------------------------------------------------------------------------------------------------------------------------------------------------------------------------------------|---|
| autism and related disorders. <i>Approche Neuropsychologique des Apprentissages chez l'Enfant</i> 23: 462-465.                                                                                                                                                                    |   |
| Gaylord V (1997) Social inclusion of adults with developmental disabilities. <i>Impact</i> 10: np.                                                                                                                                                                                | 1 |
| Gentry T, Lau S, Molinelli A, et al. (2012) The apple iPod Touch as a vocational support aid for adults with autism: Three case studies. <i>Journal of Vocational Rehabilitation</i> 37: 75-85.                                                                                   | 1 |
| Gentry T, Wallace J, Kvarfordt C, et al. (2010) Personal digital assistants as cognitive aids for high school students with autism: Results of a community-based trial. <i>Journal of Vocational Rehabilitation</i> 32: 101-107.                                                  | 2 |
| Gentry T, Kriner R, Sima A et al. (2015) Reducing the need for personal supports among workers with autism using an iPod Touch as an assistive technology: delayed randomized control trial. <i>Journal of Autism and Developmental Disorders</i> 45: 669-684.                    | 2 |
| Gilson CB and Carter EW. (2016) Promoting social interactions and job independence for college students with autism or intellectual disability: A pilot study. <i>Journal of Autism and Developmental Disorders</i> 46: 3583-3596.                                                | 2 |
| Gladh L and Sjolund A. (2014) The Validation Process: A useful tool to visualize abilities and enhance the possibilities of paid employment for people with ASD. <i>Journal of Vocational Rehabilitation</i> 41: 71-76.                                                           | 1 |
| Golan O and Baron-Cohen S. (2006) Systemizing empathy: teaching adults with Asperger syndrome or high-functioning autism to recognize complex emotions using interactive multimedia. <i>Development &amp; Psychopathology</i> 18: 591-617.                                        | 3 |
| Golan O. (2007) <i>Systemising emotions: Teaching emotion recognition to people with autism using interactive multimedia</i> . PhD thesis. Cambridge: University of Cambridge.                                                                                                    | 3 |
| Greher GR, Hillier A, Dougherty M, et al. (2010) SoundScape: An Interdisciplinary Music Intervention for Adolescents and Young Adults on the Autism Spectrum. <i>International Journal of Education &amp; the Arts</i> 11.                                                        | 1 |
| Grynszpan O, Martin JC and Nadelc J. (2008) Multimedia interfaces for users with high functioning autism: An empirical investigation. <i>International Journal of Human-Computer Studies</i> 66: 628-639.                                                                         | 4 |
| Gutman SA, Raphael EI, Ceder LM, et al. (2010) The effect of a motor-based, social skills intervention for adolescents with high-functioning autism: Two single-subject design cases. <i>Occupational Therapy International</i> 17: 188-197.                                      | 2 |
| Gutman SA, Raphael-Greenfield EI and Rao AK. (2012) Effect of a motor-based role-play intervention on the social behaviors of adolescents with high-functioning autism: Multiple-baseline single-subject design. <i>American Journal of Occupational Therapy</i> 66: 529-537.     | 2 |
| Gyori M, Stefanik K and Kanizsai-Nagy I. (2015) Evidence-based development and evaluation of mobile cognitive support apps for people on the autism spectrum: methodological conclusions from two R+D projects. <i>Studies in Health Technology &amp; Informatics</i> 217: 55-62. | 2 |
| Hagner D, Kurtz A, Cloutier H, et al. (2012) Outcomes of a family-centered transition process for students with autism spectrum disorders. <i>Focus on Autism and Other Developmental Disabilities</i> 27: 42-50.                                                                 | 2 |
| Hamilton J, Stevens G and Girdler S. (2016) Becoming a mentor: the impact of training and the experience of mentoring university students on the autism spectrum. <i>PLoS ONE</i> 11: e0153204.                                                                                   | 4 |
| Handleman JS and Harris SL. (2005) Douglass Developmental Disabilities Center: An ABA program for children and adults with autism spectrum disorders. <i>International Journal of Behavioral Consultation and Therapy</i> 1: 301-311.                                             | 2 |
| Haring TG, Kennedy CH, Adams MJ, et al. (1987) Teaching generalization of purchasing skills across community settings to autistic youth using videotape modeling. <i>Journal of Applied Behavior Analysis</i> 20: 89-96.                                                          | 2 |
| Hayes GR, Custodio VE, Haimson OL, et al. (2015) Mobile video modeling for employment interviews for individuals with autism. <i>Journal of Vocational Rehabilitation</i> 43: 275-287.                                                                                            | 2 |



|                                                                                                                                                                                                                                                                                       |   |
|---------------------------------------------------------------------------------------------------------------------------------------------------------------------------------------------------------------------------------------------------------------------------------------|---|
| Hedley D, Dissanayake C, Richdale A, et al. (2016) Long-term benefits of supported employment for adults with autism spectrum disorder. <i>Journal of Intellectual Disability Research</i> 60: 679-679.                                                                               | 1 |
| Hendrickson JM, Carson R, Woods-Groves S, et al. (2013) UI REACH: A postsecondary program serving students with autism and intellectual disabilities. <i>Education &amp; Treatment of Children</i> 36: 169-194.                                                                       | 1 |
| Hepburn SL, Blakeley-Smith A, Wolff B, et al. (2016) Telehealth delivery of cognitive-behavioral intervention to youth with autism spectrum disorder and anxiety: A pilot study. <i>Autism</i> 20: 207-218.                                                                           | 2 |
| Herbrecht E, Poustka F, Birnkammer S, et al. (2009) Pilot evaluation of the frankfurt social skills training for children and adolescents with autism spectrum disorder. <i>European Child and Adolescent Psychiatry</i> 18: 327-335.                                                 | 2 |
| Hesmondhalgh M and Breakey C. (2001) <i>Access and Inclusion for Children with Autistic Spectrum Disorders: "Let Me In."</i> London: Jessica Kingsley.                                                                                                                                | 1 |
| Higuchi Y and Noutomi K. (2010) Job support for students with autism from a special education school for students with developmental disabilities. <i>Japanese Journal of Special Education</i> 48: 97-109.                                                                           | 5 |
| Hill E, McIntosh B and Perkins D. (2011) <i>People with Asperger syndrome and employment</i> . London: Foundation for People with Learning Disabilities.                                                                                                                              | 1 |
| Holburn S and Vietze PM. (2002) A better life for Hal: Five years of person-centered planning and applied behavior analysis. In Holburn S and Vietze PM. [Ed] (2002) <i>Person-centered planning: Research, practice, and future directions</i> . Baltimore: Paul H Brookes; 291-314. | 2 |
| Holjes MK and Hatcher DN. (1987) <i>Transition from School to Work: Final Program Evaluation Report</i> . Raleigh, NC: Employment Opportunities, Inc.                                                                                                                                 | 2 |
| Holyfield C. (2013) <i>The effects of a facilitated online blog on the quality of communication life of adolescents and young adults with autism spectrum disorders</i> . MA thesis. Lawrence: University of Kansas.                                                                  | 2 |
| Honda H. (2009) [Support for persons with autism and other developmental disorders in the community from infancy to adult life]. <i>Seishin Shinkeigaku Zasshi</i> 111: 1381-1386.                                                                                                    | 5 |
| Hong ER, Ganz JB, Gilliland W, et al. (2014) Teaching caregivers to implement an augmentative and alternative communication intervention to an adult with ASD. <i>Research in Autism Spectrum Disorders</i> 8: 570-580.                                                               | 2 |
| Howlin P, Alcock J and Burkin C. (2005) An 8 year follow-up of a specialist supported employment service for high-ability adults with autism or Asperger syndrome. <i>Autism</i> 9: 533-549.                                                                                          | 1 |
| Iannuzzi D, Kopecky K, Broder-Fingert S, et al. (2015) Addressing the needs of individuals with autism: Role of hospital-based social workers in implementation of a patient-centered care plan. <i>Health &amp; Social Work</i> 40: 245-248.                                         | 1 |
| James DM, Hall A, Phillipson J, et al. (2013) Creating a person-centred culture within the North East Autism Society: Preliminary findings. <i>British Journal of Learning Disabilities</i> 41: 296-303.                                                                              | 2 |
| Jantz KM. (2011) Support groups for adults with Asperger syndrome. <i>Focus on Autism and Other Developmental Disabilities</i> 26: 119-128.                                                                                                                                           | 1 |
| Jones EA and Neil NM. (2013) Communication books and partner orientation may help to promote peer interactions in high school students with autism. <i>Evidence-Based Communication Assessment and Intervention</i> 7: 73-78.                                                         | 2 |
| Kaplan RS and Steele AL. (2005) An analysis of music therapy program goals and outcomes for clients with diagnoses on the autism spectrum. <i>Journal of Music Therapy</i> 42: 2-19.                                                                                                  | 1 |
| Keel JH, Mesibov GB and Woods AV. (1997) TEACCH-supported employment program. <i>Journal of Autism &amp; Developmental Disorders</i> 27: 3-9.                                                                                                                                         | 1 |
| Kellems RO and Morningstar ME. (2012) Using video modeling delivered through iPods to                                                                                                                                                                                                 | 4 |

|                                                                                                                                                                                                                                                                                                                                   |   |
|-----------------------------------------------------------------------------------------------------------------------------------------------------------------------------------------------------------------------------------------------------------------------------------------------------------------------------------|---|
| teach vocational tasks to young adults with autism spectrum disorders. <i>Career Development and Transition for Exceptional Individuals</i> 35: 155-167.                                                                                                                                                                          |   |
| Kellems RO. (2012) Using video modeling delivered through iPods to teach vocational tasks to young adults with autism spectrum disorders (ASD). PhD thesis, University of Kansas.                                                                                                                                                 | 4 |
| Lalonde KB, MacNeill BR, Eversole LW, et al. (2014) Increasing physical activity in young adults with autism spectrum disorders. <i>Research in Autism Spectrum Disorders</i> 8: 1679-1684.                                                                                                                                       | 2 |
| Lanning L. (2000) <i>People with autism: the effectiveness of the TEACCH programme</i> . Norwich: University of East Anglia.                                                                                                                                                                                                      | 2 |
| Lattimore LP, Parsons MB and Reid DH. (2008) Simulation training of community job skills for adults with autism: a further analysis. <i>Behavior Analysis in Practice</i> 1: 24-29.                                                                                                                                               | 2 |
| Lawer L, Brusilovskiy E, Salzer MS, et al. (2009) Use of vocational rehabilitative services among adults with autism. <i>Journal of Autism &amp; Developmental Disorders</i> 39: 487-494.                                                                                                                                         | 2 |
| Lazarus C, Cameron G and Smith L. (2014) <i>Evaluation of the proactive grants programme in autism: report to the Clothworkers' Foundation</i> . London: Office for Public Management.                                                                                                                                            | 1 |
| Leaf JB, Mitchell E, Townley-Cochran D, et al. (2016) Comparing Social Stories (TM) to Cool Versus Not Cool. <i>Education and Treatment of Children</i> 39: 173-185.                                                                                                                                                              | 2 |
| Leaf JB, Taubman M, Milne C, et al. (2016) teaching social communication skills using a Cool Versus Not Cool procedure plus role-playing and a social skills taxonomy. <i>Education and Treatment of Children</i> 39: 44-63.                                                                                                      | 2 |
| Lecuyer R and Guelfi JD. (2009) Social skills training for autistic adults: Discussion. <i>Annales Medico-Psychologiques</i> 167: 302-302.                                                                                                                                                                                        | 5 |
| Lerner MD and Mikami AY. (2012) A preliminary randomized controlled trial of two social skills interventions for youth with high-functioning autism spectrum disorders. <i>Focus on Autism and Other Developmental Disabilities</i> 27: 147-157.                                                                                  | 2 |
| Lerner MD, Mikami AY and Levine K. (2011) Socio-dramatic affective-relational intervention for adolescents with Asperger syndrome & high functioning autism: Pilot study. <i>Autism</i> 15: 21-42.                                                                                                                                | 2 |
| Longtin S. (2014) Practice brief: Interdisciplinary support services for students with autism spectrum disorders. <i>Journal of Postsecondary Education and Disability</i> 27: 333-342.                                                                                                                                           | 1 |
| Lord C. (1995) Facilitating social inclusion: Examples from peer intervention programs. In Schopler, Eric and Mesibov, Gary B [Ed] (1995) <i>Learning and Cognition in Autism</i> . New York: Plenum Press; 221-240.                                                                                                              | 1 |
| Mackey M and Nelson G. (2015) Twins with autism: Utilising video feedback to improve job-related behaviours. <i>British Journal of Special Education</i> 42: 390-410.                                                                                                                                                             | 2 |
| MacLeod A and Johnston P. (2007) Standing out and fitting in: A report on a support group for individuals with asperger syndrome using a personal account. <i>British Journal of Special Education</i> 34: 83-88.                                                                                                                 | 1 |
| Macleod A. (1999) The Birmingham community support scheme for adults with Asperger syndrome. <i>Autism</i> 3: 177-192.                                                                                                                                                                                                            | 1 |
| Marwick H and Tait C. (2007) <i>Final Report. Evaluation of 'No. 6': the One-Stop-Shop for Adults with Asperger's Syndrome and High Functioning Autism, in Edinburgh and the Lothians</i> . Glasgow: National Centre for Autism Studies, University of Strathclyde.                                                               | 1 |
| Matthews A. (1996) Employment training and the development of a support model within employment for adults who experience Asperger syndrome and autism: The Gloucestershire Group Homes Model. In Morgan, Hugh (1996) <i>Adults with Autism: A guide to theory and practice</i> . Cambridge: Cambridge University Press; 163-184. | 1 |
| Mavranouzouli I, Megnin-Viggars O, Cheema N et al. (2014) The cost-effectiveness of supported employment for adults with autism in the United Kingdom. <i>Autism</i> 18: 975-984.                                                                                                                                                 | 1 |
| Mavropoulou S, Nikolarazi M and Seremetidou N. (2008) A qualitative study of teachers' views about befriending persons with special needs. <i>Teacher Education and Special Education</i> 31: 93-102.                                                                                                                             | 2 |

|                                                                                                                                                                                                                                                      |   |
|------------------------------------------------------------------------------------------------------------------------------------------------------------------------------------------------------------------------------------------------------|---|
| McCabe H and Wu S. (2009) Helping each other, helping ourselves: A case of employment for an adult with autism in Nanjing, China. <i>Journal of Vocational Rehabilitation</i> 30: 57-66.                                                             | 1 |
| McCarty MM. (2013) <i>The experience of college students diagnosed with Asperger's disorder and participating in a university-based autism spectrum transitional support program</i> . EdD thesis, University of Rochester.                          | 1 |
| McClannahan LE and Krantz PJ. (1997) Princeton Child Development Institute. <i>Behavior and Social Issues</i> 7: 65-68.                                                                                                                              | 1 |
| McClannahan LE, MacDuff GS and Krantz PJ. (2002) Behavior analysis and intervention for adults with autism. <i>Behavior Modification</i> 26: 9-26.                                                                                                   | 1 |
| McConkey R. (2010) <i>Transitions and young people with autism spectrum disorders: executive summary</i> . Jordanstown: University of Ulster.                                                                                                        | 1 |
| Mechling LC, Gast DL and Seid NH. (2009) Using a personal digital assistant to increase independent task completion by students with autism spectrum disorder. <i>Journal of Autism &amp; Developmental Disorders</i> 39: 1420-1434.                 | 2 |
| Migliore A, Butterworth J, Zalewska A, et al. (2012) <i>What Are the Trends in Employment Outcomes of Youth with Autism: 2006-2010?</i> Research to Practice Issue 53. Boston: Institute for Community Inclusion.                                    | 1 |
| Migliore A, Timmons J, Butterworth J, et al. (2012) Predictors of employment and postsecondary education of youth with autism. <i>Rehabilitation Counseling Bulletin</i> 55: 176-184.                                                                | 2 |
| Mitchell P, Parsons S and Leonard A. (2007) Using virtual environments for teaching social understanding to 6 adolescents with autistic spectrum disorders. <i>Journal of Autism and Developmental Disorders</i> 37: 589-600.                        | 4 |
| Miyajima M, Omiya H, Yamashita K, et al. (2016) The effects of cognitive remediation therapy using the frontal/executive program for autism spectrum disorder. <i>International Journal of Psychiatry in Medicine</i> 51: 223-235.                   | 2 |
| Moretton J and Dugas E. (2011) Autistic spectrum and physical education: Towards learning opportunities? <i>A N A E Approche Neuropsychologique des Apprentissages chez l'Enfant</i> 23: 452-459.                                                    | 5 |
| National Audit Office. (2009) <i>Supporting people with autism through adulthood: Report by the Comptroller and Auditor General</i> . London: Stationery Office.                                                                                     | 1 |
| Naulls K. (2013) Work in progress. <i>Occupational Health</i> 65: 16-17.                                                                                                                                                                             | 1 |
| Nieto C, Murillo E, Belinchon M, et al. (2015) Supporting people with autism spectrum disorders in leisure time: Impact of an university volunteer program, and related factors. <i>Anales de Psicologia</i> 31: 145-154.                            | 1 |
| Odom Samuel L, Boyd Brian A, Hall Laura J, et al. (2010) Evaluation of comprehensive treatment models for individuals with autism spectrum disorders. <i>Journal Of Autism And Developmental Disorders</i> 40: 425-436.                              | 3 |
| O'Handley RD, Radley KC and Whipple HM. (2015) The relative effects of social stories and video modeling toward increasing eye contact of adolescents with autism spectrum disorder. <i>Research in Autism Spectrum Disorders</i> 11: 101-111.       | 2 |
| Ozonoff S and Miller JN. (1995) Teaching Theory of Mind: A New Approach to Social Skills Training for Individuals with Autism. <i>Journal Of Autism And Developmental Disorders</i> 25: 415-433.                                                     | 2 |
| Pahnke J, Lundgren T, Hursti T, et al. (2014) Outcomes of an acceptance and commitment therapy-based skills training group for students with high-functioning autism spectrum disorder: A quasi-experimental pilot study. <i>Autism</i> 18: 953-964. | 2 |
| Palmen A, Didden R and Verhoeven L. (2012) A personal digital assistant for improving independent transitioning in adolescents with high-functioning autism spectrum disorder. <i>Developmental Neurorehabilitation</i> 15: 401-413.                 | 2 |
| Parker C, Jones M and Wheatcroft D. (2008) Supporting and caring for adults with ASD:                                                                                                                                                                | 2 |

|                                                                                                                                                                                                                                                                                              |   |
|----------------------------------------------------------------------------------------------------------------------------------------------------------------------------------------------------------------------------------------------------------------------------------------------|---|
| developing job-specific ASD training. <i>Good Autism Practice</i> 9: 9-16.                                                                                                                                                                                                                   |   |
| Parsons MB, Reid DH and Lattimore LP. (2009) Increasing independence of adults with autism in community activities: a brief, embedded teaching strategy. <i>Behavior Analysis in Practice</i> 2: 40-48.                                                                                      | 2 |
| Plienis AJ, Hansen DJ and Ford F. (1987) Behavioral small group training to improve the social skills of emotionally-disordered adolescents. <i>Behavior Therapy</i> 18: 17-32.                                                                                                              | 2 |
| Quinn S, Gleeson Claire I and Nolan C. (2014) An occupational therapy support service for university students with Asperger's Syndrome (AS). <i>Occupational Therapy in Mental Health</i> 30: 109-125.                                                                                       | 1 |
| Retherford KS and Schreiber LR. (2015) Camp campus: College preparation for adolescents and young adults with high-functioning autism, Asperger syndrome, and other social communication disorders. <i>Topics in Language Disorders</i> 35: 362-385.                                         | 1 |
| Reynolds JL, Pitchford EA, Hauck JL, et al. (2016) Outcomes of home-support consultation on the maintenance of bicycle-riding skills for youth with autism spectrum disorder. <i>Journal of Educational and Psychological Consultation</i> 26: 166-185.                                      | 1 |
| Ridout S, Guldberg K and Macleod A. (2011) <i>Hear me out! Supporting young people (16-18) on the Autism Spectrum living in Warwickshire: An evaluation of the adult model</i> . S.I.: Autism Centre for Education and Research.                                                             | 1 |
| Rigsby-Eldredge M and McLaughlin T. (1992) The effects of modeling and praise on self-initiated behavior across settings with two adolescent students with autism. <i>Journal of Developmental and Physical Disabilities</i> 4: 205-218.                                                     | 2 |
| Rose R and Anketell C. (2009) The benefits of social skills groups for young people with autism spectrum disorder: A pilot study. <i>Child Care in Practice</i> 15: 127-144.                                                                                                                 | 2 |
| Ross J, Marcell J, Williams P, et al. (2013) Postsecondary education employment and independent living outcomes of persons with autism and intellectual disability. <i>Journal of Postsecondary Education and Disability</i> 26: 337-351.                                                    | 2 |
| Rowland-Crosby N, Giraud-Saunders A and Swift P. (2004) <i>Developing Connexions: young people with disabilities, mental health needs or autistic spectrum disorders</i> . London: Foundation for People with Learning Disabilities.                                                         | 2 |
| Saiano M, Garbarino E, Lumachi S, et al. (2015) Effect of interface type in the VR-based acquisition of pedestrian skills in persons with ASD. Engineering in Medicine and Biology Society (EMBC), 2015 37th Annual International Conference of the IEEE: 5728-5731.                         | 2 |
| Saiano M, Pellegrino L, Casadio M, et al. (2015) Natural interfaces and virtual environments for the acquisition of street crossing and path following skills in adults with Autism Spectrum Disorders: a feasibility study. <i>Journal of Neuroengineering &amp; Rehabilitation</i> 12: 17. | 2 |
| Samuels R and Stansfield J. (2012) The effectiveness of Social Stories to develop social interactions with adults with characteristics of autism spectrum disorder. <i>British Journal of Learning Disabilities</i> 40: 272-285.                                                             | 2 |
| Schall CM, Wehman P, Brooke V, et al. (2015) Employment interventions for individuals with ASD: The relative efficacy of supported employment with or without prior Project SEARCH training. <i>Journal Of Autism and Developmental Disorders</i> 45: 3990-4001.                             | 2 |
| Schaller J and Yang NK. (2005) Competitive employment for people with autism: Correlates of successful closure in competitive and supported employment. <i>Rehabilitation Counseling Bulletin</i> 49: 4-16.                                                                                  | 1 |
| Senechal C, Fontaine C, Larivee S, et al. (2011) Integration in workforce of Quebec adults living with autism spectrum disorder or Asperger syndrome. <i>Sante Mentale au Quebec</i> 36: 181-199.                                                                                            | 5 |
| Shrieber B and Cohen Y. (2013) Using photos and visual-processing assistive technologies to develop self-expression and interpersonal communication of adolescents with Asperger Syndrome (AS). <i>Interdisciplinary Journal of E-Learning and Learning Objects</i> 9: 267-286.              | 1 |
| Smith MD and Belcher R. (1985) Teaching life skills to adults disabled by autism. <i>Journal of</i>                                                                                                                                                                                          | 2 |

|                                                                                                                                                                                                                                                            |   |
|------------------------------------------------------------------------------------------------------------------------------------------------------------------------------------------------------------------------------------------------------------|---|
| <i>Autism &amp; Developmental Disorders</i> 15: 163-175.                                                                                                                                                                                                   |   |
| Suzuki K. (2015) Vocational training and job placement for people with Autism Spectrum Disorders in the business sector. <i>Seishin Shinkeigaku Zasshi</i> 117: 221-227.                                                                                   | 5 |
| Tobin MC. (2016) Development of interaction during a social skills intervention group for emerging adults with autism spectrum disorders. PhD thesis. University Park: Pennsylvania State University.                                                      | 2 |
| Turner S and Giraud-Saunders A. (2014) <i>Personal health budgets: including people with learning disabilities</i> . London: Think Local Act Personal.                                                                                                     | 1 |
| Van Der Aa C, Pollmann MMH, Plaat A, et al. (2016) Computer-mediated communication in adults with high-functioning autism spectrum disorders and controls. <i>Research in Autism Spectrum Disorders</i> 23: 15-27.                                         | 1 |
| Verhoeven EW, Marijnissen N, Berger HJ, et al. (2012) Brief report: relationship between self-awareness of real-world behavior and treatment outcome in autism spectrum disorders. <i>Journal of Autism &amp; Developmental Disorders</i> 42: 889-894.     | 3 |
| Vragovic R, Frey S and Fulgosi M. (2014) Stimulating life environment and support for adults with autistic spectrum disorders. <i>Socijalna Psihijatrija</i> 42: 220-229.                                                                                  | 5 |
| Watanabe M and Sturmey P. (2003) The effect of choice-making opportunities during activity schedules on task engagement of adults with autism. <i>Journal of Autism &amp; Developmental Disorders</i> 33: 535-538.                                         | 2 |
| Wehman P, Brooke V, Brooke AM, et al. (2016) Employment for adults with autism spectrum disorders: A retrospective review of a customized employment approach. <i>Research in Developmental Disabilities</i> 53-54: 61-72.                                 | 1 |
| Wehman P, Lau S, Molinelli A, et al. (2012) Supported employment for young adults with Autism Spectrum Disorder: preliminary data. <i>Research and Practice for Persons with Severe Disabilities</i> 37: 160-169.                                          | 2 |
| Wehman P, Schall C, McDonough J, et al. (2013) Project SEARCH for youth with autism spectrum disorders: Increasing competitive employment on transition from high school. <i>Journal of Positive Behavior Interventions</i> 15: 144-155.                   | 1 |
| Wehman PH, Schall CM, McDonough J, et al. (2014) Competitive employment for youth with autism spectrum disorders: early results from a randomized clinical trial. <i>Journal of Autism &amp; Developmental Disorders</i> 44: 487-500.                      | 2 |
| Weidle B, Bolme B and Hoeyland AL. (2006) Are peer support groups for adolescents with Asperger's syndrome helpful? <i>Clinical Child Psychology &amp; Psychiatry</i> 11: 45-62.                                                                           | 2 |
| Wener P et al. (2009) GROW a programme to enable transitioning to community living. <i>Good Autism Practice</i> 10: 68-72.                                                                                                                                 | 1 |
| Wentz E, Nyden A and Krevers B. (2012) Development of an internet-based support and coaching model for adolescents and young adults with ADHD and autism spectrum disorders: a pilot study. <i>European Child &amp; Adolescent Psychiatry</i> 21: 611-622. | 2 |
| Wenzel C and Rowley L. (2010) Teaching social skills and academic strategies to college students with Asperger's Syndrome. <i>Teaching Exceptional Children</i> 42: 44-50.                                                                                 | 1 |
| Wilhite S and Bullock LM. (2012) Effects of the WhyTry social skills program on students with emotional and/or behavioral problems in an alternative school. <i>Emotional and Behavioural Difficulties</i> 17: 175-194.                                    | 2 |
| Wilmer-Barbrook C. (2013) Adolescence, Asperger's and acting: Can dramatherapy improve social and communication skills for young people with Asperger's syndrome? <i>Dramatherapy</i> 35: 43-56.                                                           | 1 |
| Wolff M, Adrien J-L and Gattegno MP. (2005) A study of the support function of persons with autism through the analysis of semi-conducted interviews. <i>Revue Quebecoise de Psychologie</i> 26: 183-204.                                                  | 5 |
| Wolff M, Gattegno M-P and Adrien J-L. (2009) The occupational role and prospects of French supervisory psychologists supporting autistic persons. <i>Revue Quebecoise de Psychologie</i> 30:                                                               | 5 |

|                                                                                                                                                                                                                                                                                                                                                              |   |
|--------------------------------------------------------------------------------------------------------------------------------------------------------------------------------------------------------------------------------------------------------------------------------------------------------------------------------------------------------------|---|
| 143-162.                                                                                                                                                                                                                                                                                                                                                     |   |
| Yamamoto S, Kagami Y, Ogura M, et al. (2013) Effects of basic social skills training and simulation training on acquisition of social skills related to employment: Adults with high-functioning pervasive developmental disorders. <i>Japanese Journal of Special Education</i> 51: 291-299.                                                                | 5 |
| Yilmaz I, Yanarda M, Birkan B, et al. (2004) Effects of swimming training on physical fitness and water orientation in autism. <i>Pediatrics International</i> 46: 624-626.                                                                                                                                                                                  | 2 |
| Yokoi H, Kim S-Y, Igarashi M, et al. (2014) Present status of ASD from childhood to adulthood and an intervention initiative for adults with ASD in Japan. In Raynaud, Jean-Philippe, Hodes, Matthew and Gau, Susan Shur-Fen [Ed] (2014) <i>From Research to Practice in Child and Adolescent Mental Health</i> . Lanham, MD: Rowman & Littlefield; 179-198. | 1 |
| Yokoyama M. (2015) Support for adult ASD in medical rework program: Mutual communication program and psychodrama. <i>Seishin Shinkeigaku Zasshi</i> 117: 212-220.                                                                                                                                                                                            | 5 |
| Zimmerman ET. (2014) <i>A pilot study exploring the educational and social/emotional benefits of web-based groups for parents of adolescents with Autism Spectrum Disorders</i> . PhD thesis, University of Denver.                                                                                                                                          | 2 |
| Zingale M, Belfiore G, Mongelli V, et al. (2008) Organization of a family training service pertaining to intellectual disabilities. <i>Journal of Policy and Practice in Intellectual Disabilities</i> 5: 69-72.                                                                                                                                             | 2 |

**Table 2. Systematic reviews scanned for references**

|                                                                                                                                                                                                                                                                                      |
|--------------------------------------------------------------------------------------------------------------------------------------------------------------------------------------------------------------------------------------------------------------------------------------|
| Anestis MD, Anestis JC, Zawilinski LL, et al. (2014) Equine-related treatments for mental disorders lack empirical support: A systematic review of empirical investigations. <i>Journal of Clinical Psychology</i> 70: 1115-1132.                                                    |
| Aresti-Bartolome N and Garcia-Zapirain B. (2014) Technologies as support tools for persons with autistic spectrum disorder: a systematic review. <i>International Journal of Environmental Research &amp; Public Health</i> 11: 7767-7802.                                           |
| Bennett KD and Dukes C. (2013) Employment instruction for secondary students with autism spectrum disorder: A systematic review of the literature. <i>Education and Training in Autism and Developmental Disabilities</i> 48: 67-75.                                                 |
| Bishop-Fitzpatrick L, Minshew NJ and Eack SM. (2013) A systematic review of psychosocial interventions for adults with autism spectrum disorders. <i>Journal of Autism and Developmental Disorders</i> 43: 687-694.                                                                  |
| Boisvert M, Lang R, Andrianopoulos M, et al. (2010) Telepractice in the assessment and treatment of individuals with autism spectrum disorders: A systematic review. <i>Developmental Neurorehabilitation</i> 13: 423-432.                                                           |
| Carr ME, Moore DW and Anderson A. (2014) Self-management interventions on students with autism: A meta-analysis of single-subject research. <i>Exceptional Children</i> 81: 28-44.                                                                                                   |
| Case-Smith J and Arbesman M. (2008) Evidence-based review of interventions for autism used in or of relevance to occupational therapy. <i>American Journal of Occupational Therapy</i> 62: 416-429.                                                                                  |
| Cernyw E. (2015) <i>Group interventions for adults with ASD</i> . PhD thesis. Bangor: University of Bangor.                                                                                                                                                                          |
| Cullen JM and Alber-Morgan SR. (2015) Technology mediated self-prompting of daily living skills for adolescents and adults with disabilities: A review of the literature. <i>Education and Training in Autism and Developmental Disabilities</i> 50: 43-55.                          |
| den Brok WL and Sterkenburg PS. (2015) Self-controlled technologies to support skill attainment in persons with an autism spectrum disorder and/or an intellectual disability: A systematic literature review. <i>Disability &amp; Rehabilitation Assistive Technology</i> 10: 1-10. |
| Di R, Nguyen T, Mulvale G, et al. (2016) A scoping review of evaluated interventions addressing developmental transitions for youth with mental health disorders. <i>Child Care Health and</i>                                                                                       |

|                                                                                                                                                                                                                                                                                                                                                 |
|-------------------------------------------------------------------------------------------------------------------------------------------------------------------------------------------------------------------------------------------------------------------------------------------------------------------------------------------------|
| <i>Development</i> 42: 176-187.                                                                                                                                                                                                                                                                                                                 |
| Diehl JJ, Schmitt LM, Villano M, et al. (2012) The clinical use of robots for individuals with Autism Spectrum Disorders: A critical review. <i>Research in Autism Spectrum Disorders</i> 6: 249-262.                                                                                                                                           |
| Dogoe M and Banda DR. (2009) Review of recent research using constant time delay to teach chained tasks to persons with developmental disabilities. <i>Education and Training in Developmental Disabilities</i> 44: 177-186.                                                                                                                    |
| Gardner S and Wolfe P. (2013) Use of video modeling and video prompting interventions for teaching daily living skills to individuals with Autism Spectrum Disorders: A review. <i>Research and Practice for Persons with Severe Disabilities</i> 38: 73-87.                                                                                    |
| Gelbar NW, Smith I and Reichow B. (2014) Systematic review of articles describing experience and supports of individuals with autism enrolled in college and university programs. <i>Journal of Autism &amp; Developmental Disorders</i> 44: 2593-2601.                                                                                         |
| Grynszpan O, Weiss PL, Perez-Diaz F, et al. (2014) Innovative technology- based interventions for autism spectrum disorders: A meta-analysis. <i>Autism</i> 18: 346-361.                                                                                                                                                                        |
| Gustafsson C, Ojehagen A, Hansson L, et al. (2009) Effects of psychosocial interventions for people with intellectual disabilities and mental health problems: A survey of systematic reviews. <i>Research on Social Work Practice</i> 19: 281-290.                                                                                             |
| Hedley D, Uljarevic M, Cameron L, et al. (2016) Employment programmes and interventions targeting adults with autism spectrum disorder: A systematic review of the literature. <i>Autism</i> , Online First 18 August 2016.                                                                                                                     |
| Hong ER, Ganz JB, Mason R, et al. (2016) The effects of video modeling in teaching functional living skills to persons with ASD: A meta-analysis of single-case studies. <i>Research in Developmental Disabilities</i> 57: 158-169.                                                                                                             |
| Hughes C, Kaplan L, Bernstein R, et al. (2012) Increasing social interaction skills of secondary school students with autism and/or intellectual disability: A review of interventions. <i>Research and Practice for Persons with Severe Disabilities</i> 37: 288-307.                                                                          |
| Hwang YS and Kearney P. (2013) A systematic review of mindfulness intervention for individuals with developmental disabilities: Long-term practice and long lasting effects. <i>Research in Developmental Disabilities</i> 34: 314-326.                                                                                                         |
| Jacob A, Scott M, Falkmer M, et al. (2015) The costs and benefits of employing an adult with Autism Spectrum Disorder: A systematic review. <i>PLoS ONE</i> 10: e0139896.                                                                                                                                                                       |
| Kagohara DM, van der Meer L, Ramdoss S, et al. (2013) Using iPods and iPads in teaching programs for individuals with developmental disabilities: A systematic review. <i>Research in Developmental Disabilities</i> 34: 147-156.                                                                                                               |
| Kasari C, Shire S, Factor R, et al. (2014) Psychosocial treatments for individuals with autism spectrum disorder across the lifespan: new developments and underlying mechanisms. <i>Current Psychiatry Reports</i> 16: 512.                                                                                                                    |
| McDonald TA and Machalicek W. (2013) Systematic review of intervention research with adolescents with autism spectrum disorders. <i>Research in Autism Spectrum Disorders</i> 7: 1439-1460.                                                                                                                                                     |
| National Collaborating Centre For Mental Health. (2012) <i>Autism: the NICE guideline on recognition, referral, diagnosis and management of adults on the autism spectrum</i> . London: National Institute for Health and Clinical Excellence.                                                                                                  |
| National Institute For Health and Care Excellence. (2014) <i>Autism in adults: evidence update May 2014: a summary of selected new evidence relevant to NICE clinical guideline 142 'Autism: recognition, referral, diagnosis and management of adults on the autism spectrum'</i> . London: National Institute for Health and Care Excellence. |
| New Zealand Guidelines Group. (2012) <i>Guideline supplementary paper: New Zealand Autism Spectrum Disorder Guideline. Supplementary Evidence on Supported Employment Services</i> . Wellington: New Zealand Guidelines Group.                                                                                                                  |
| Odom Samuel L, Thompson Julie L, Hedges S, et al. (2015) Technology-aided interventions and instruction for adolescents with Autism Spectrum Disorder. <i>Journal of Autism and Developmental</i>                                                                                                                                               |

|                                                                                                                                                                                                                                                                       |
|-----------------------------------------------------------------------------------------------------------------------------------------------------------------------------------------------------------------------------------------------------------------------|
| <i>Disorders</i> 45: 3805-3819.                                                                                                                                                                                                                                       |
| O'Haire ME. (2013) Animal-assisted intervention for Autism Spectrum Disorder: A systematic literature review. <i>Journal of Autism and Developmental Disorders</i> 43: 1606-1622.                                                                                     |
| Palmen A, Didden R and Lang R. (2012) A systematic review of behavioral intervention research on adaptive skill building in high-functioning young adults with autism spectrum disorder. <i>Research in Autism Spectrum Disorders</i> 6: 602-617.                     |
| Ramdoss S, Machalicek W, Rispoli M, et al. (2012) Computer-based interventions to improve social and emotional skills in individuals with autism spectrum disorders: A systematic review. <i>Developmental Neurorehabilitation</i> 15: 119-135.                       |
| Reichow B and Volkmar FR. (2010) Social skills interventions for individuals with autism: Evaluation for evidence-based practices within a best evidence synthesis framework. <i>Journal of Autism and Developmental Disorders</i> 40: 149-166.                       |
| Reichow B and Volkmar FR. (2010) Social skills interventions for individuals with autism: Evaluation for evidence-based practices within a best evidence synthesis framework. <i>Journal of Autism and Developmental Disorders</i> 14: 149-166.                       |
| Reichow B, Steiner AM and Volkmar F. (2013) Cochrane review: Social skills groups for people aged 6 to 21 with autism spectrum disorders (ASD). <i>Evidence-Based Child Health</i> 8: 266-315.                                                                        |
| Rispoli M, Neely L, Lang R, et al. (2011) Training paraprofessionals to implement interventions for people autism spectrum disorders: A systematic review. <i>Developmental Neurorehabilitation</i> 14: 378-388.                                                      |
| Robertson J and Emerson E. (2006) <i>A systematic review of comparative benefits and costs of models of providing residential and vocational supports to adults with autistic spectrum disorder</i> . Lancaster: Lancaster University, Institute for Health Research. |
| Rossignol DA. (2009) Novel and emerging treatments for autism spectrum disorders: A systematic review. <i>Annals of Clinical Psychiatry</i> 21: 213-236.                                                                                                              |
| Roth ME, Gillis JM, DiGennaro R, et al. (2014) A meta-analysis of behavioral interventions for adolescents and adults with autism spectrum disorders. <i>Journal of Behavioral Education</i> 23: 258-286.                                                             |
| Seaman RL and Cannella-Malone HI. (2016) Vocational skills interventions for adults with autism spectrum disorder: A review of the literature. <i>Journal of Developmental and Physical Disabilities</i> 28: 479-494.                                                 |
| Shattuck PT, Roux AM, Hudson LE, et al. (2012) Services for adults with an autism spectrum disorder. <i>Canadian Journal of Psychiatry</i> 57: 284-291.                                                                                                               |
| Sowa M and Meulenbroek R. (2012) Effects of physical exercise on Autism Spectrum Disorders: A meta-analysis. <i>Research in Autism Spectrum Disorders</i> 6: 46-57.                                                                                                   |
| Spain D and Blainey SH. (2015) Group social skills interventions for adults with high-functioning autism spectrum disorders: A systematic review. <i>Autism</i> 19: 874-886.                                                                                          |
| Spain D, Harwood L and O'Neill L. (2015) Psychological interventions for adults with autism spectrum disorders: a review. <i>Advances in Autism</i> 1: 79-86.                                                                                                         |
| Taylor JL, Dove D, Veenstra-VanderWeele J, et al. (2012) <i>Interventions for adolescents and young adults with Autism Spectrum Disorders</i> . Rockville, MD: Agency for Healthcare Research and Quality.                                                            |
| Taylor JL, McPheeters ML, Sathe NA, et al. (2012) A systematic review of vocational interventions for young adults with autism spectrum disorders. <i>Pediatrics</i> 130: 531-538.                                                                                    |
| Tobin MC, Drager KDR and Richardson LF. (2014) A systematic review of social participation for adults with autism spectrum disorders: Support, social functioning, and quality of life. <i>Research in Autism Spectrum Disorders</i> 8: 214-229.                      |
| Virues-Ortega J, Julio FM and Pastor-Barriuso R. (2013) The TEACCH program for children and adults with autism: a meta-analysis of intervention studies. <i>Clinical Psychology Review</i> 33: 940-953.                                                               |
| Wang SY, Parrila R and Cui Y. (2013) Meta-analysis of social skills interventions of single-case research for individuals with autism spectrum disorders: Results from three-level HLM. <i>Journal of Autism and Developmental Disorders</i> 43: 1701-1716.           |
| Westbrook JD et al. (2012) Adult employment assistance services for persons with autistic spectrum                                                                                                                                                                    |



|                                                                                                                                                                                        |
|----------------------------------------------------------------------------------------------------------------------------------------------------------------------------------------|
| disorders: Effects on employment outcomes. <i>Campbell Systematic Reviews</i> 5.                                                                                                       |
| Westbrook JD, Fong CJ, Nye C et al. (2015) Transition services for youth with autism: a systematic review. <i>Research on Social Work Practice</i> 25: 10-20.                          |
| Wong C, Odom SL, Hume K, et al. (2014) <i>Evidence-based practices for children, youth and young adults with Autism Spectrum Disorder</i> . Chapel Hill: University of North Carolina. |
